# Supplementary material for: Saturation Transfer Difference NMR and Molecular Docking Interaction Study of Aralkyl-Thiodigalactosides as Potential Inhibitors of the Human-Galectin-3 Protein
Source: MDPI journal article supplement (doi:10.3390/ijms25031742), 2024-02-01

## Table of Content

|                                                                                                                                                                                                                                                             |    |
|-------------------------------------------------------------------------------------------------------------------------------------------------------------------------------------------------------------------------------------------------------------|----|
| <b>1D and 2D NMR spectra of synthesised compounds (1) – (5).</b> .....                                                                                                                                                                                      | 2  |
| <b>Figure S1.</b> $^1\text{H}$ (a), $^1\text{H}$ - $^{13}\text{C}$ HSQC (b), $^1\text{H}$ - $^{13}\text{C}$ HMBC (c), $^1\text{H}$ - $^{13}\text{C}$ HSQC-CLIP-COSY (d) NMR spectra of (5) .....                                                            | 2  |
| <b>Figure S2.</b> $^1\text{H}$ (a), $^{13}\text{C}$ (b), $^1\text{H}$ - $^1\text{H}$ COSY (c), $^1\text{H}$ - $^{13}\text{C}$ HSQC (d), $^1\text{H}$ - $^{13}\text{C}$ HMBC (e), $^1\text{H}$ - $^{13}\text{C}$ HSQC-CLIP-COSY (f) NMR spectra of (1) ..... | 3  |
| <b>Figure S3.</b> $^1\text{H}$ (a), $^{13}\text{C}$ (b), $^1\text{H}$ - $^{13}\text{C}$ HSQC (c) $^1\text{H}$ - $^{13}\text{C}$ HMBC (d), $^1\text{H}$ - $^{13}\text{C}$ HSQC-CLIP-COSY (e) NMR spectra of (2).....                                         | 6  |
| <b>Figure S4.</b> $^1\text{H}$ (a), $^{13}\text{C}$ (b), $^1\text{H}$ - $^{13}\text{C}$ HSQC (c) $^1\text{H}$ - $^{13}\text{C}$ HMBC (d), $^1\text{H}$ - $^{13}\text{C}$ HSQC-CLIP-COSY (e) spectra of (3).....                                             | 8  |
| <b>Figure S5.</b> $^1\text{H}$ (a), $^{13}\text{C}$ (b), $^1\text{H}$ - $^1\text{H}$ COSY (c), $^1\text{H}$ - $^{13}\text{C}$ HSQC (d) NMR spectra of (4) .....                                                                                             | 10 |

## 1D and 2D NMR spectra of synthesised compounds (1) – (5).

**Figure S1.**  $^1\text{H}$  (a),  $^1\text{H}$ - $^{13}\text{C}$  HSQC (b),  $^1\text{H}$ - $^{13}\text{C}$  HMBC (c),  $^1\text{H}$ - $^{13}\text{C}$  HSQC-CLIP-COSY (d) NMR spectra of (5)

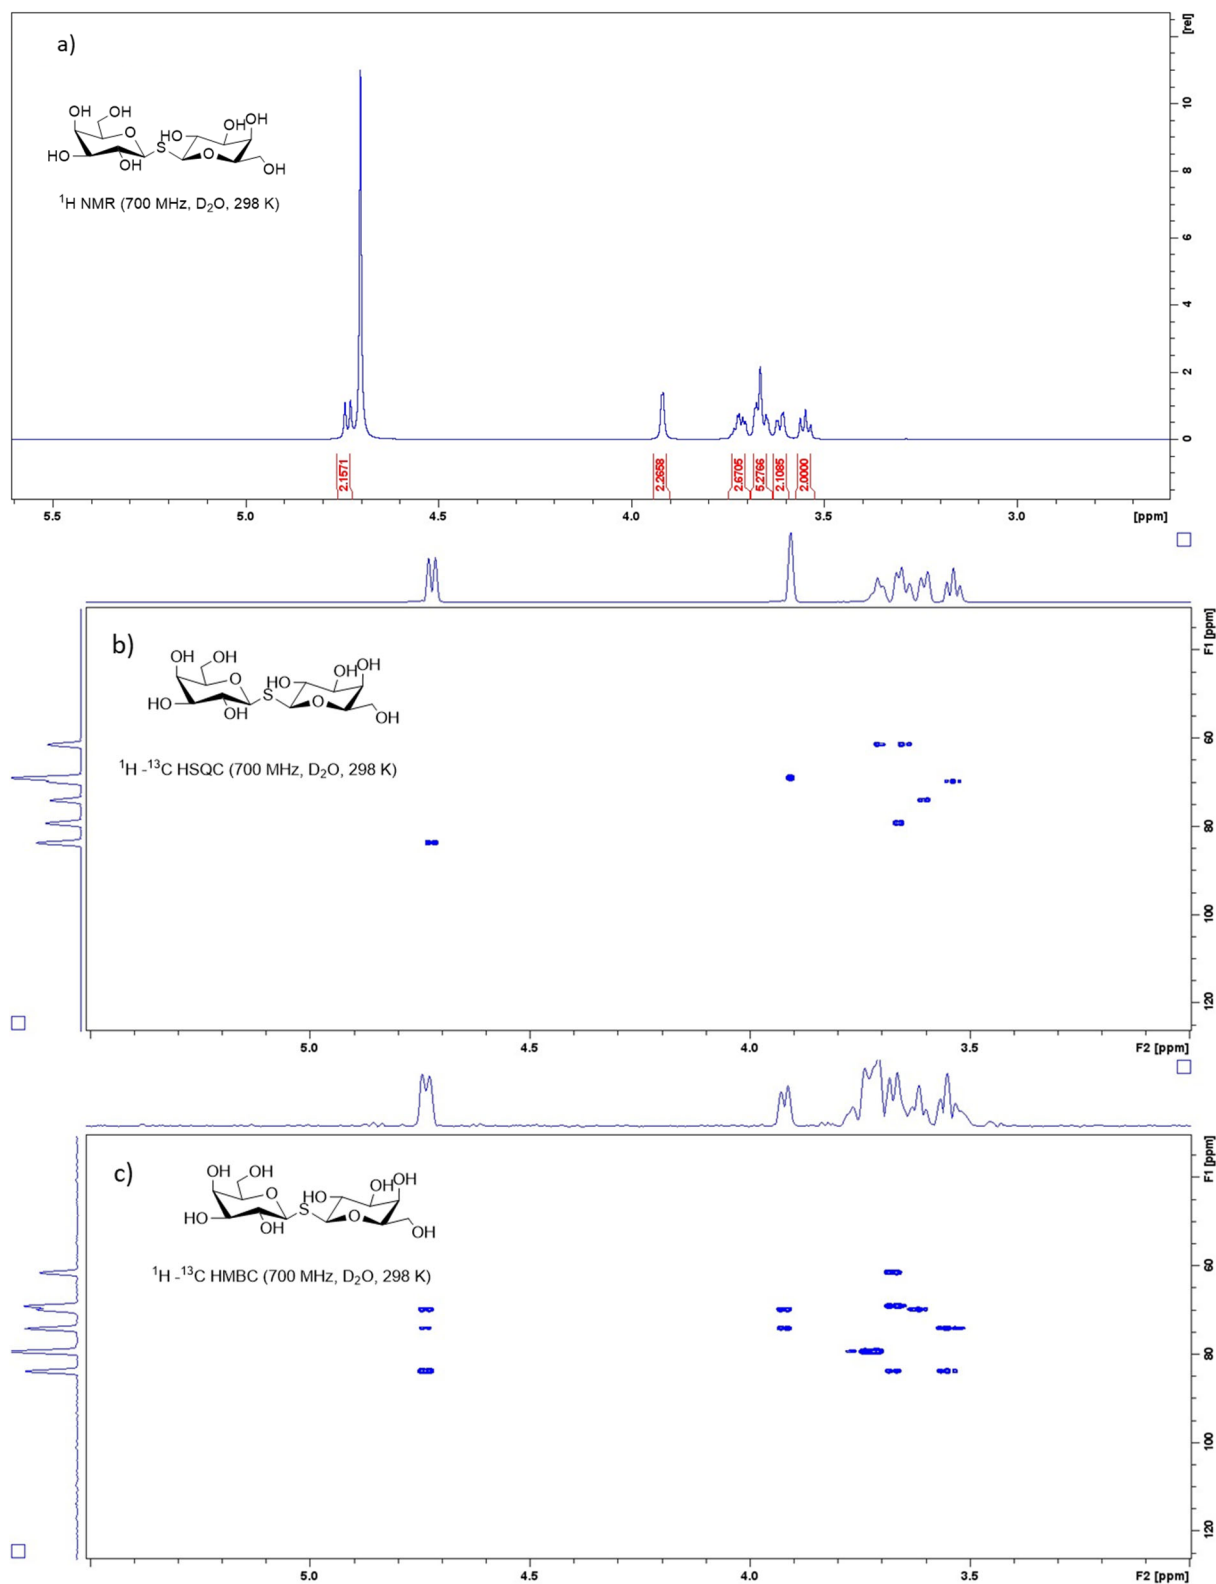

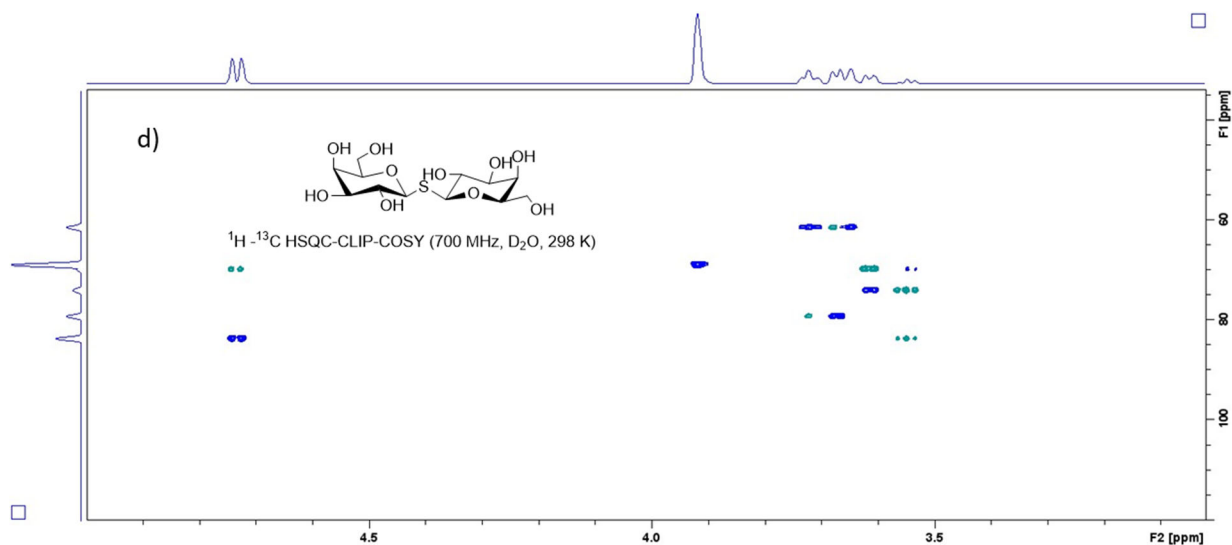

**Figure S2.**  $^1\text{H}$  (a),  $J$ -modulated  $^{13}\text{C}$  (b),  $^1\text{H}$ - $^1\text{H}$  COSY (c),  $^1\text{H}$ - $^{13}\text{C}$  HSQC (d),  $^1\text{H}$ - $^{13}\text{C}$  HMBC (e),  $^1\text{H}$ - $^{13}\text{C}$  HSQC-CLIP-COSY (f) NMR spectra of (**1**)

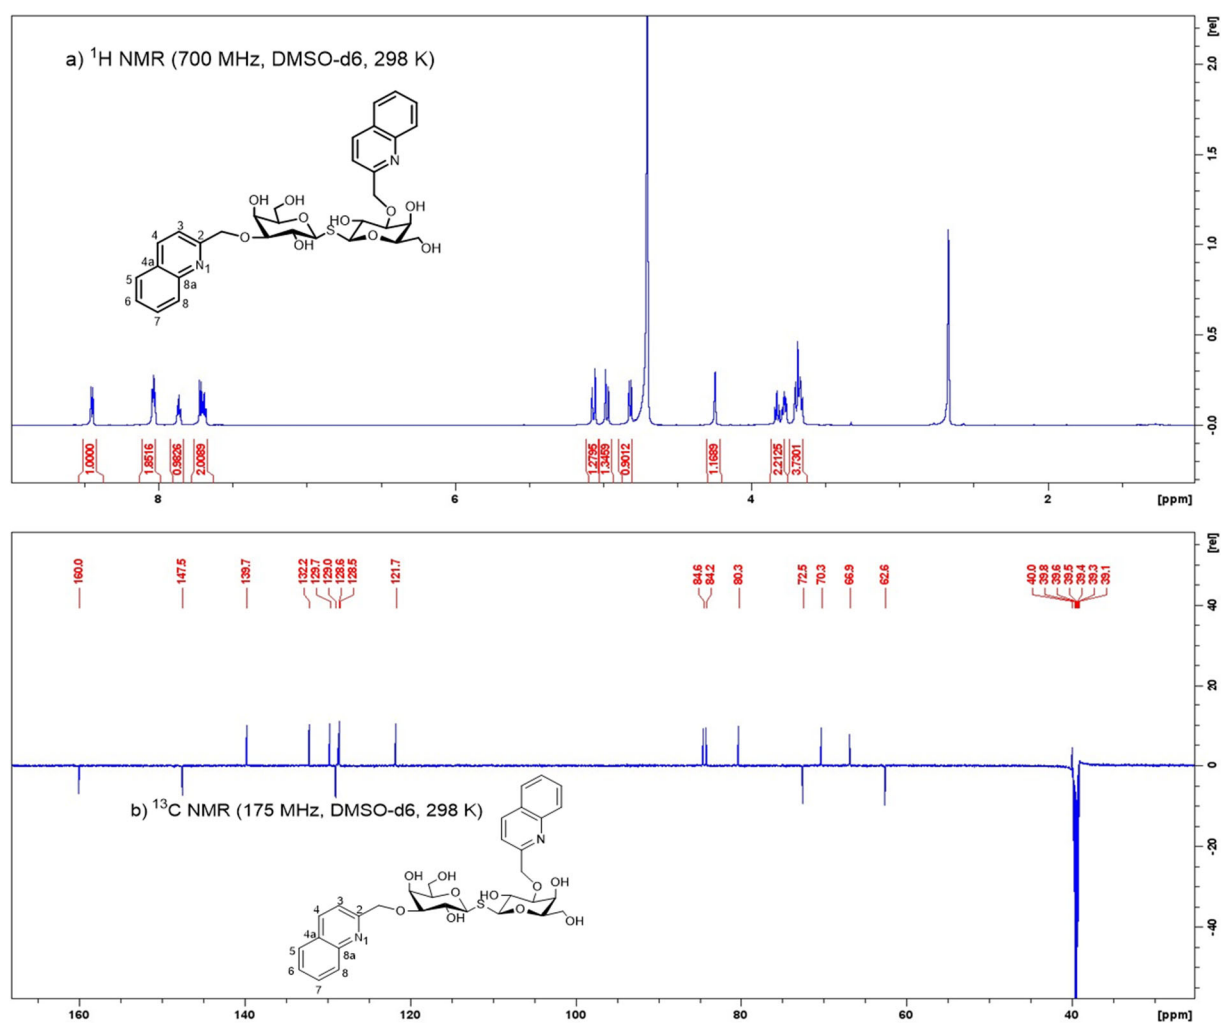

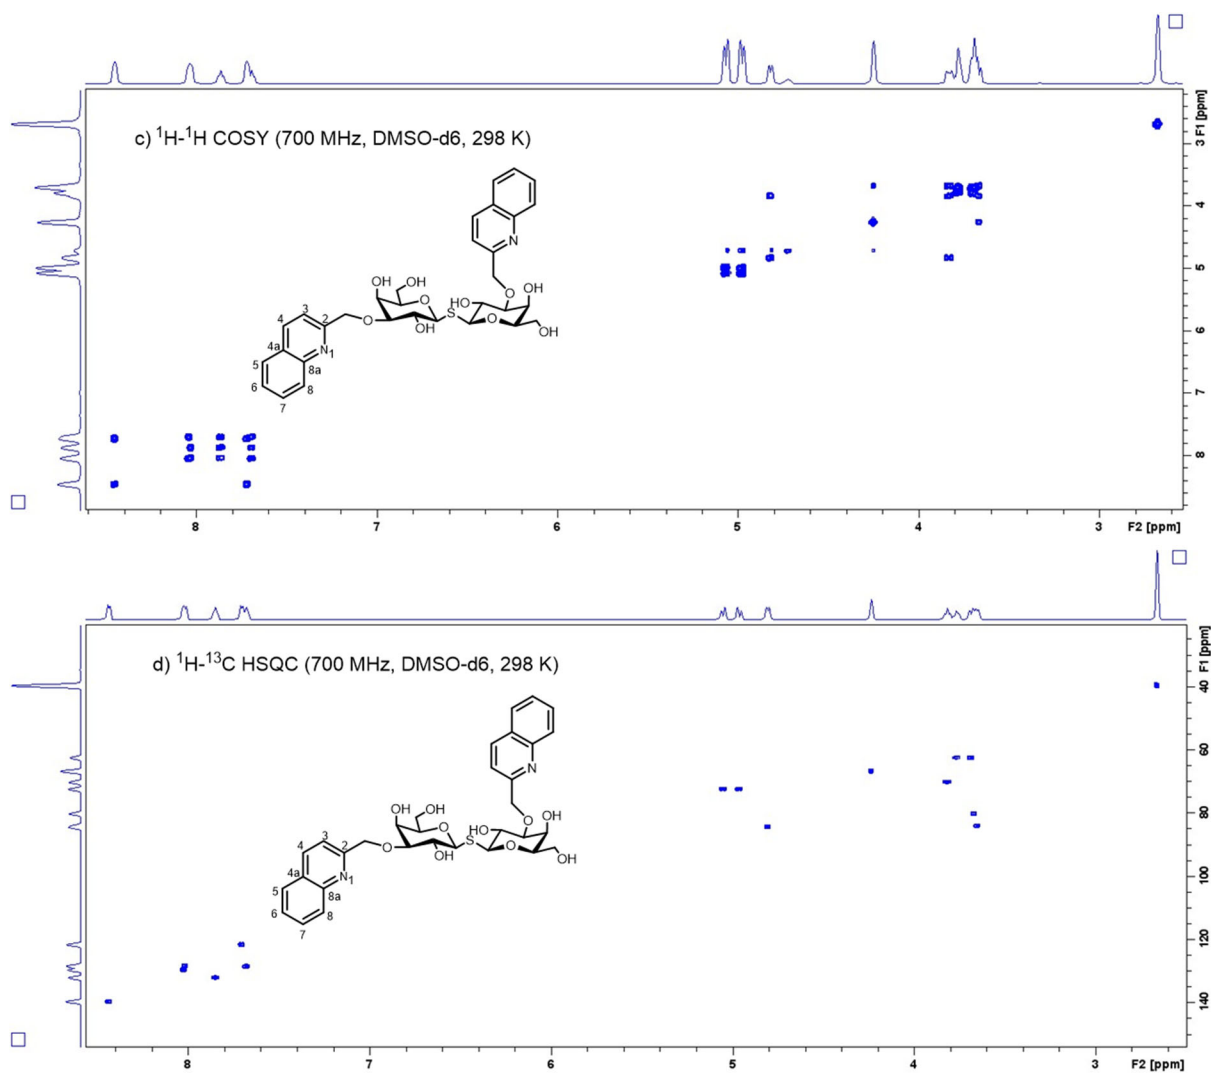

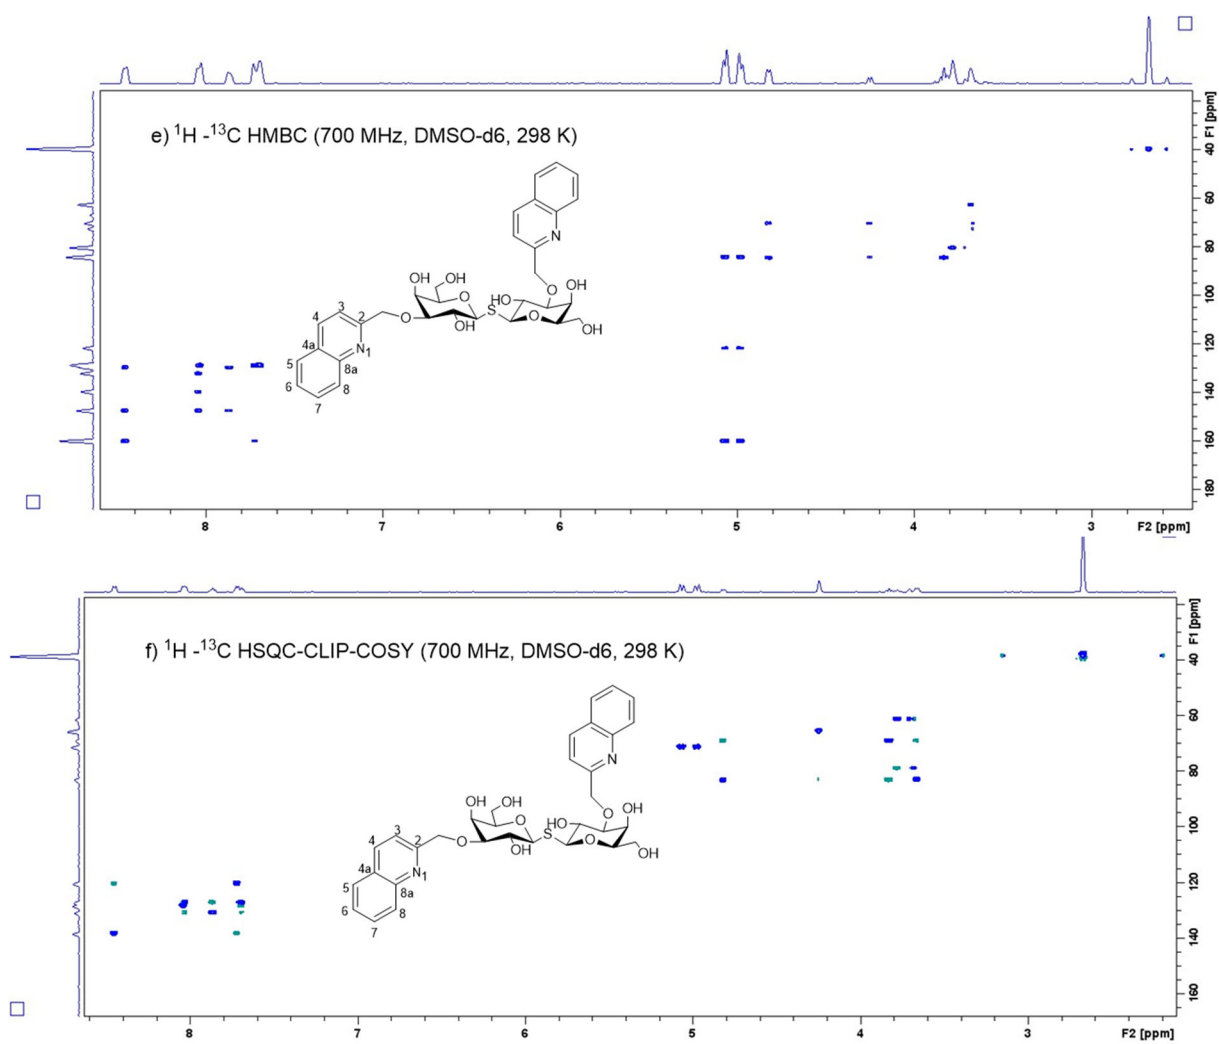

**Figure S3.**  $^1\text{H}$  (a),  $J$ -modulated  $^{13}\text{C}$  (b),  $^1\text{H}$ - $^{13}\text{C}$  COSY (c)  $^1\text{H}$ - $^{13}\text{C}$  HMBC (d),  $^1\text{H}$ - $^{13}\text{C}$  HSQC-CLIP-COSY (e) NMR spectra of (**2**)

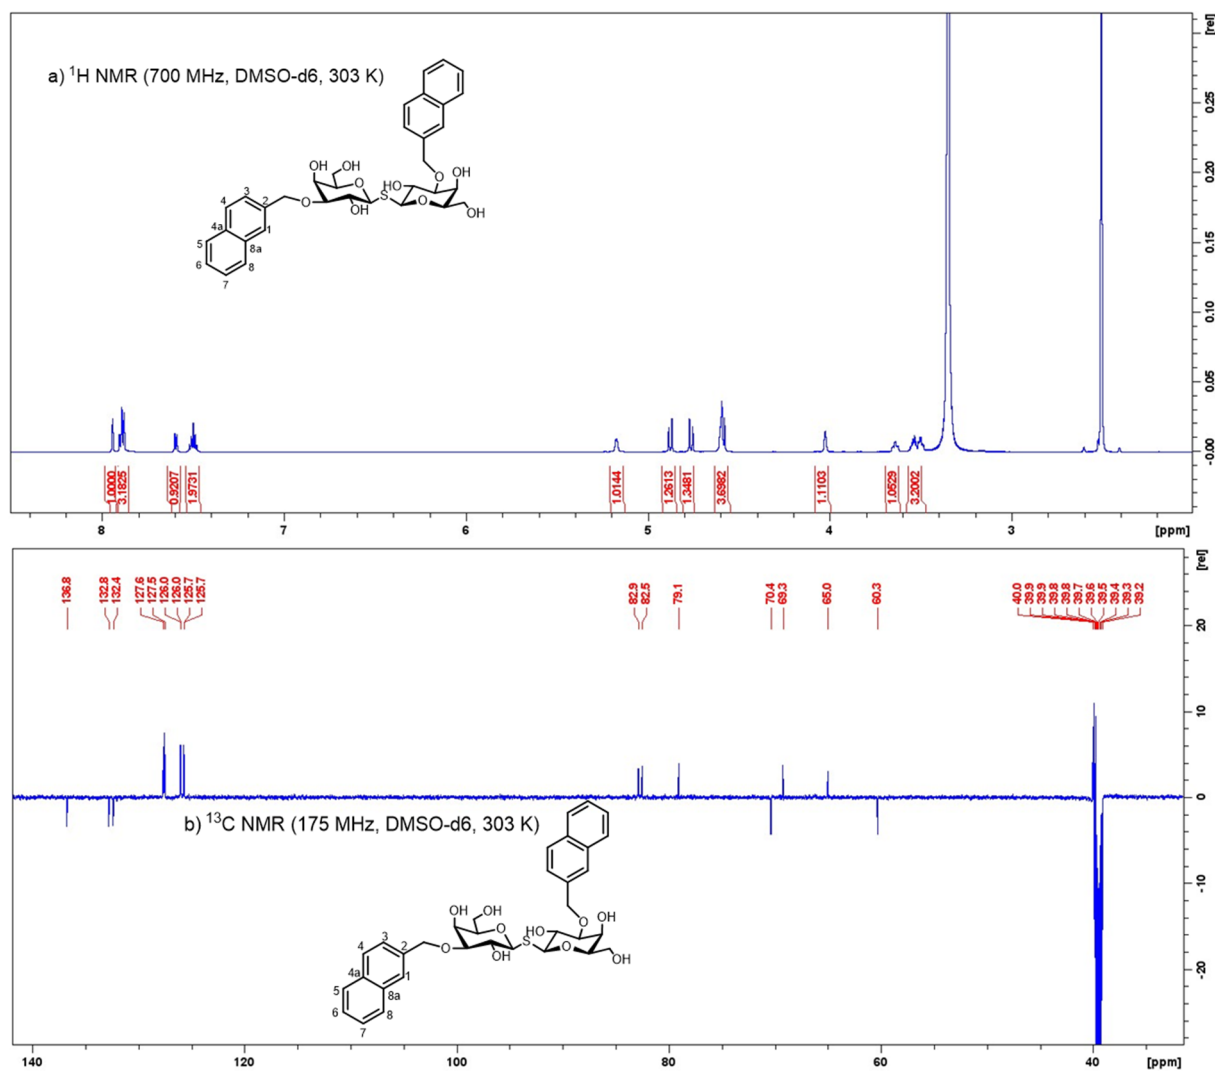

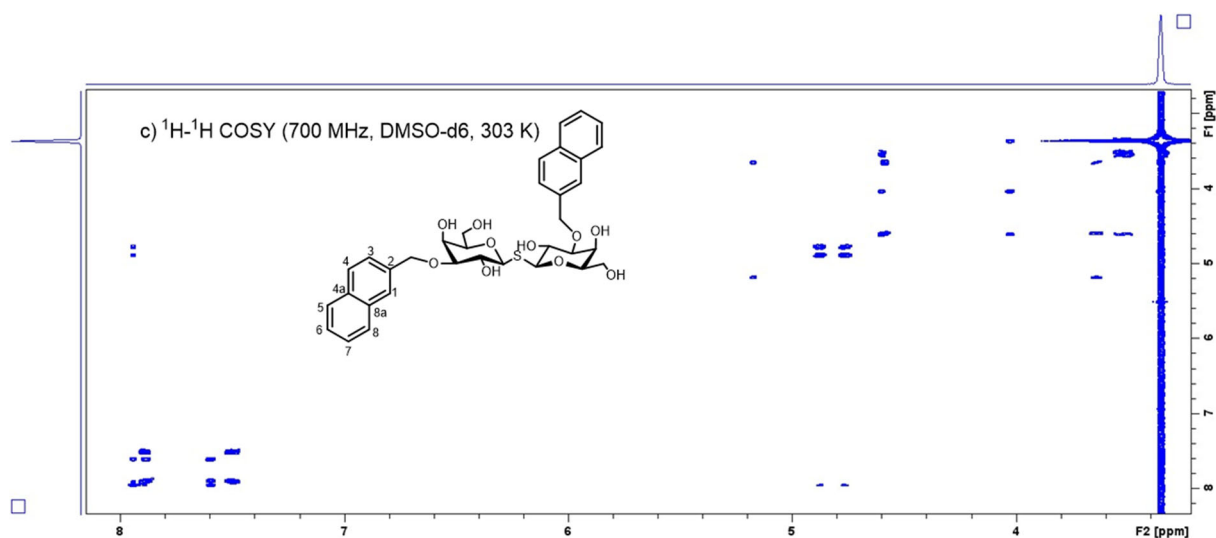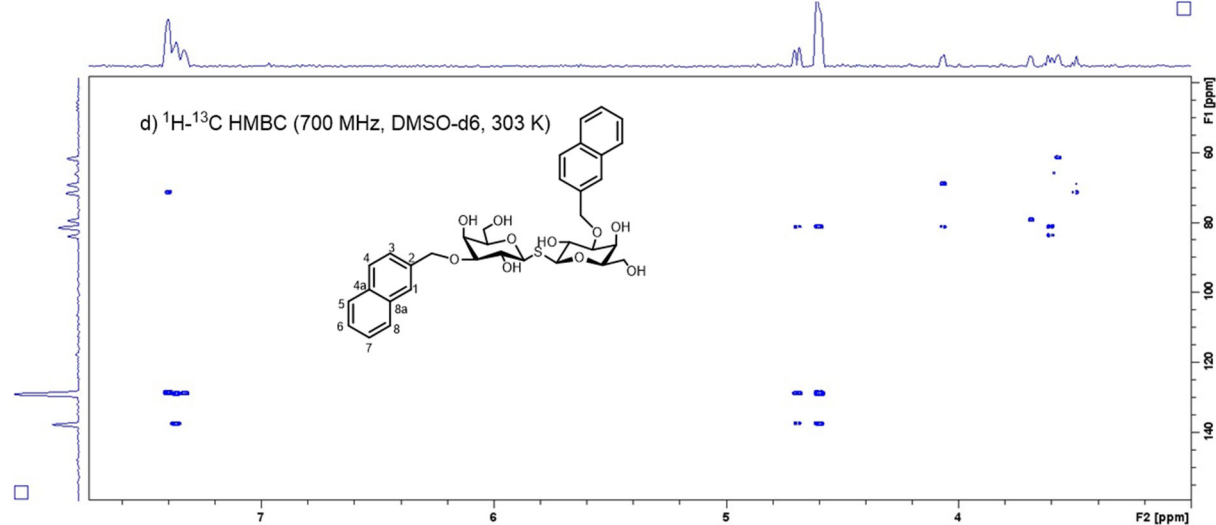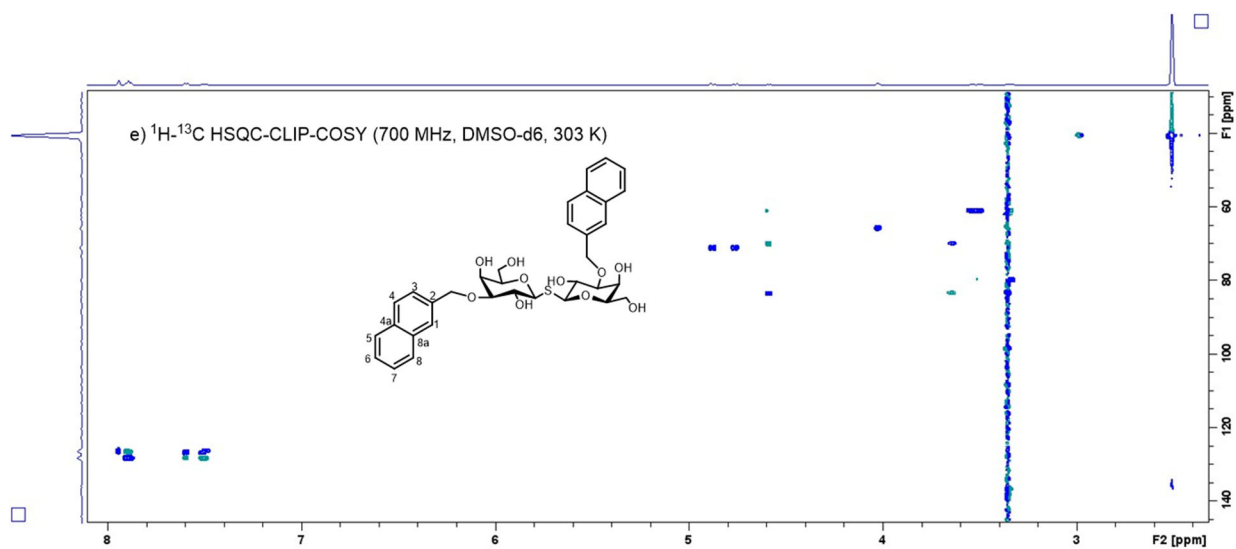

**Figure S4.**  $^1\text{H}$  (a),  $J$ -modulated  $^{13}\text{C}$  (b),  $^1\text{H}$ - $^{13}\text{C}$  HSQC (c)  $^1\text{H}$ - $^{13}\text{C}$  HMBC (d),  $^1\text{H}$ - $^{13}\text{C}$  HSQC-CLIP-COSY (e) spectra of (**3**)

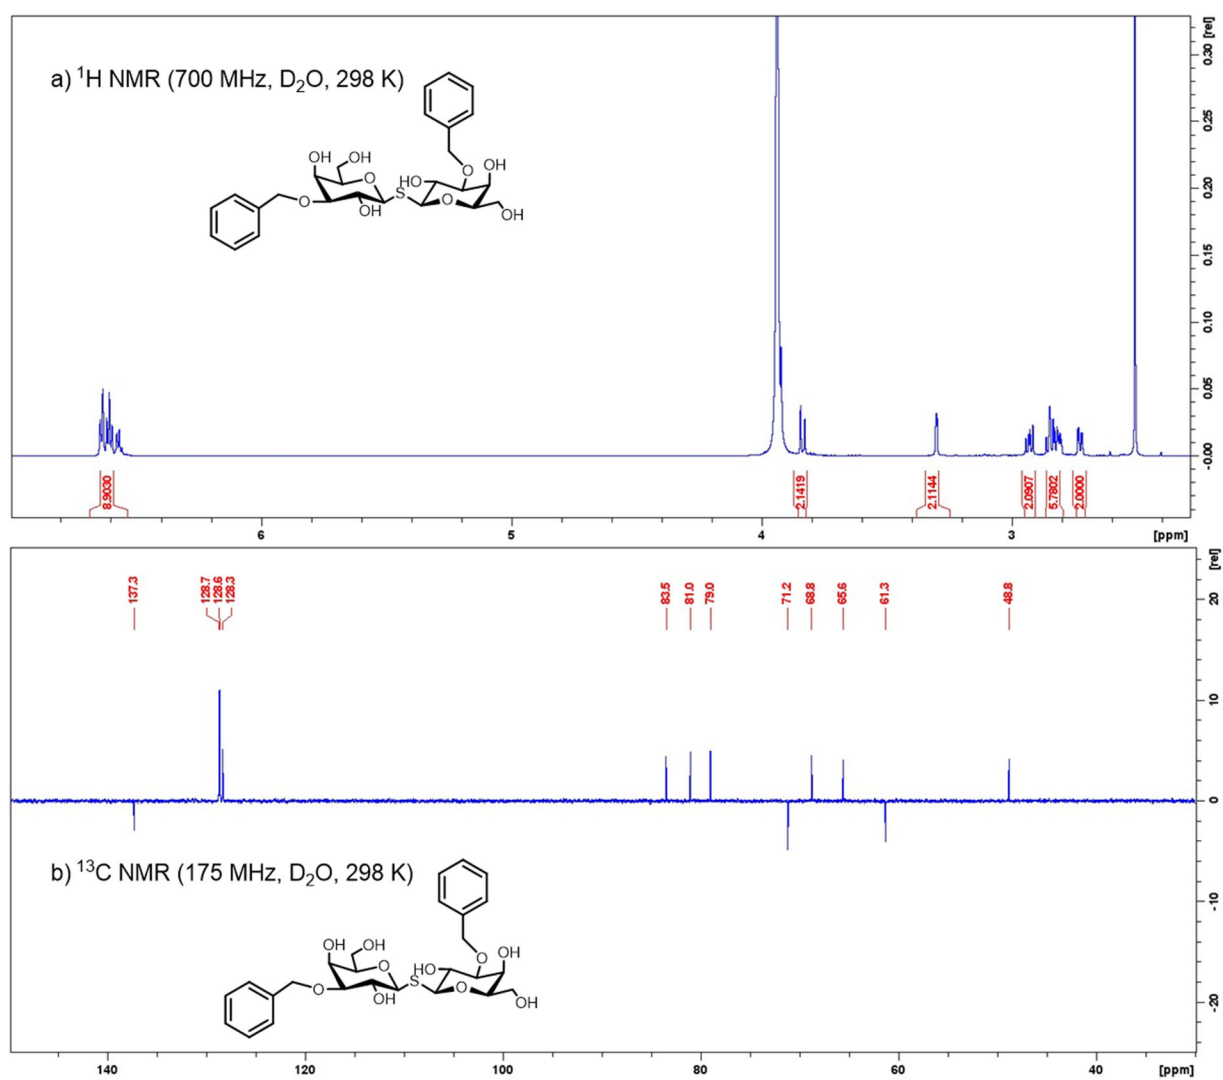



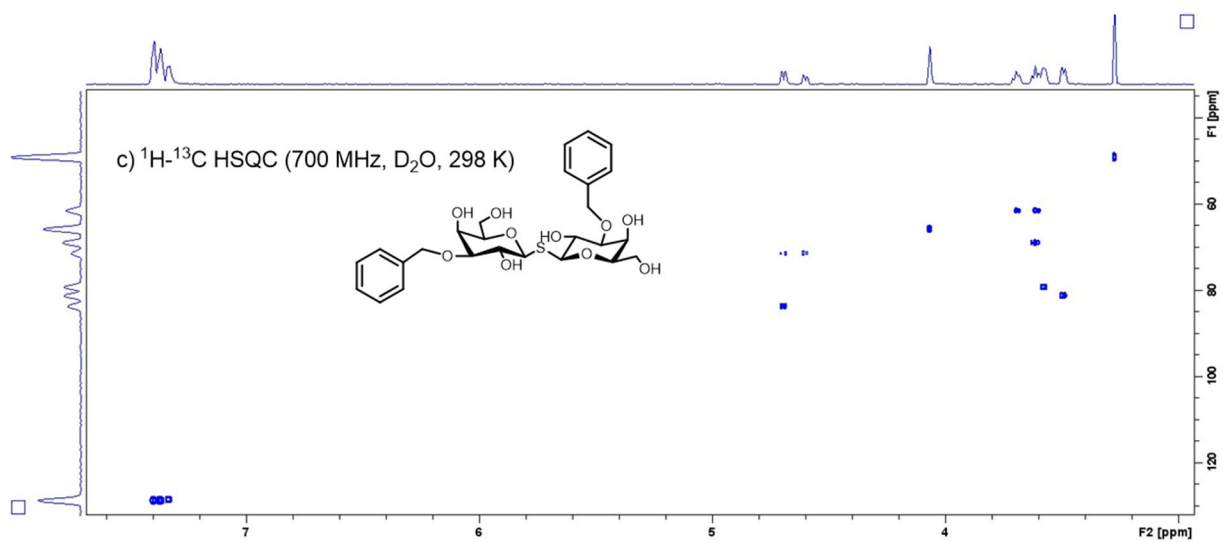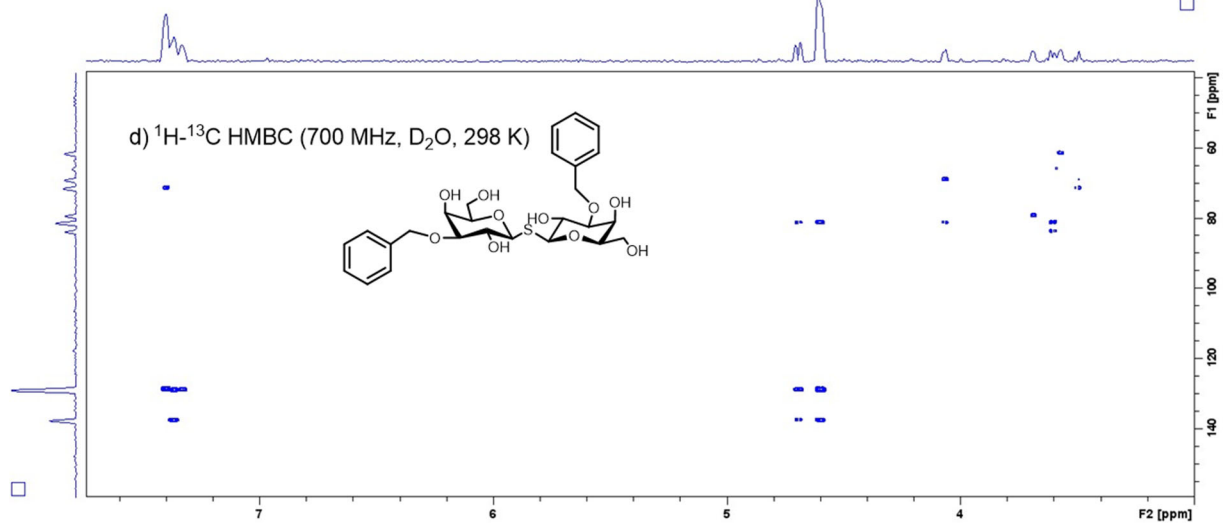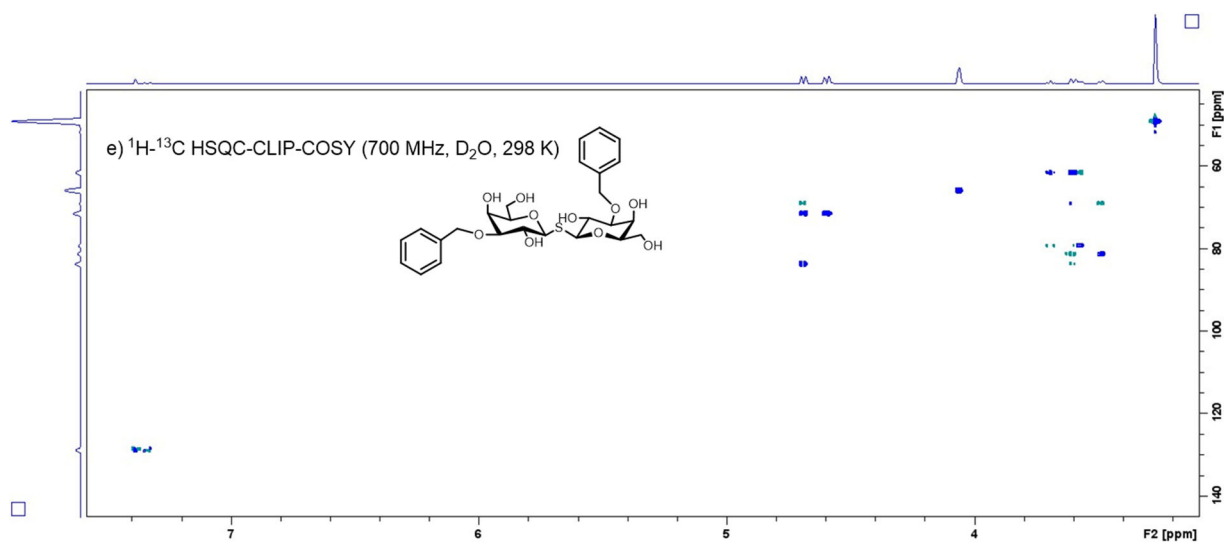

a)  $^1\text{H}$  NMR (500 MHz, DMSO- $d_6$ , 298 K)

COC1=CC=C(C(=C1)Oc2cc(O)c(S[C@@H]3O[C@H](CO[C@@H]4[C@H](O)[C@@H](CO[C@@H]4O)C5=CC(=C(C=C5)OC)OC5=O)O)C(=O)O

Integration values (from left to right): 1.0000, 1.1110, 1.0903, 0.9790, 1.0393, 1.0770, 1.2017, 1.0081, 1.0602, 1.1555, 3.6700, 1.3069, 3.2944.

b)  $^{13}\text{C}$  NMR (125 MHz, DMSO- $d_6$ , 298 K)

COC1=CC=C(C(=C1)Oc2cc(O)c(S[C@@H]3O[C@H](CO[C@@H]4[C@H](O)[C@@H](CO[C@@H]4O)C5=CC(=C(C=C5)OC)OC5=O)O)C(=O)O

Chemical shift values (ppm) (from left to right): 162.2, 160.5, 154.9, 153.3, 129.8, 125.6, 112.2, 110.7, 108.9, 100.8, 82.3, 82.8, 79.0, 68.1, 64.1, 64.9, 60.3, 55.9, 40.0, 39.8, 39.7, 39.5, 39.3, 39.2, 39.0.

c)  $^1\text{H}$ - $^1\text{H}$  COSY (500 MHz, DMSO- $d_6$ , 298 K)

COC1=CC=C(C(=C1)Oc2cc(O)c(S[C@@H]3O[C@H](CO[C@@H]4[C@H](O)[C@@H](CO[C@@H]4O)C5=CC(=C(C=C5)OC)OC5=O)O)C(=O)O

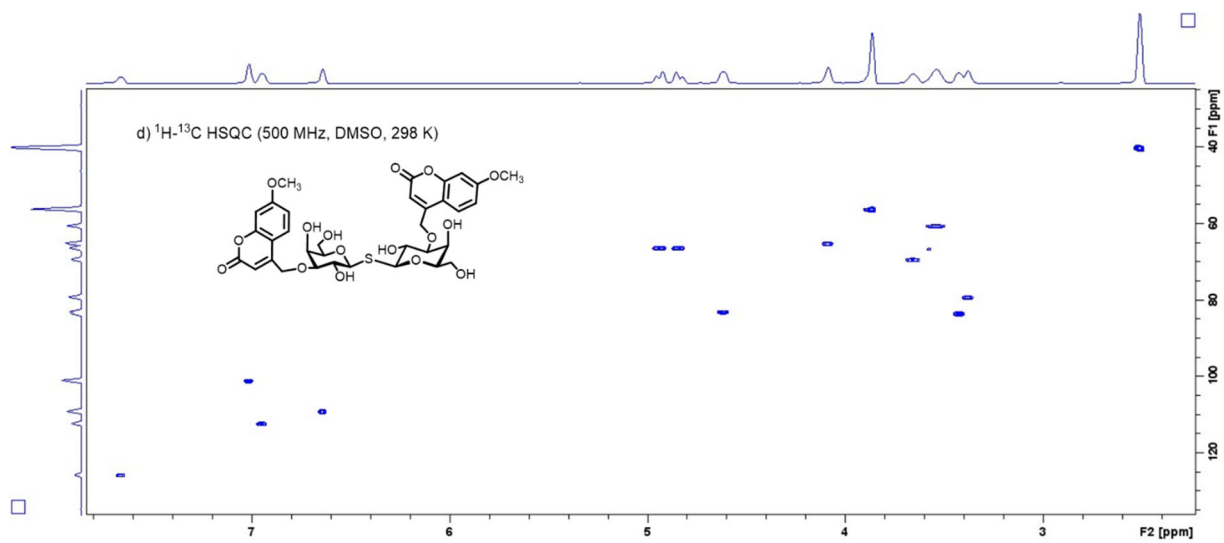

Supplement: s1 [file s1]
